# Supplementary material
Source: PubMed Central journal article supplement (PMC2859275)
Supplement: 10.3163.1536-5050.98.2.009-sg001.pdf [file 10.3163.1536-5050.98.2.009-sg001.pdf]

## **Linking clinic patients to Internet-based condition-specific information prescriptions**

**Emily Coberly, MD; Suzanne Austin Boren, PhD, MHA; J. Wade Davis, PhD; Amanda L.**

**McConnell, MA; Rebecca Chitima-Matsiga, MS, MPH; Bin Ge, MD, MA; Robert A. Logan, PhD;**

**William C. Steinmann, MD, MSc; Robert H. Hodge, MD**

### **APPENDIX**

#### **Control patient survey questions**

1. Do you have Internet access in your home?
2. Where do you have Internet access that you use most frequently for personal use?
3. On average, how many days per week do you access the Internet for personal use?
4. Prior to your recent clinic visit, had you ever used the Internet to find information about health?
5. Do you have favorite Internet sources for health information?
6. Have you ever discussed any health information you read on the Internet during a clinic visit with your health care provider?
7. Have you recently discussed any health information you read in a magazine or newspaper, heard on the radio, or saw on television with a health care provider?
8. What health information did you receive at your recent clinic visit?
9. From the health information sources you received during your recent clinic visit, which one did you find most helpful?
10. Have you heard of MedlinePlus, a health information website?
11. Have you ever used MedlinePlus?
12. What is the highest level of education you have completed?

#### **Intervention patient survey questions**

All of the above questions except number 7, plus:

1. We sent you a Health Information Prescription following your recent clinic visit. Did you receive it?
2. Did you click on any of the links contained in the Health Information Prescription?
3. If you did not click on any of the links, please tell us the most likely reason.
4. Do you find the information in the Health Information Prescription more valuable because your doctor prescribed it?
5. How did you use (or do you plan to use) the information in the Health Information Prescription?
6. Were you satisfied with the quality of information found on the MedlinePlus website?
7. How likely are you to use MedlinePlus again?
8. Would you like to receive a Health Information Prescription following future clinic visits?
